# 1 Elucidating the CodY regulon in 2 *Staphylococcus aureus* USA300 3 substrains

4  
5 Ye Gao<sup>1,2</sup>, Saugat Poudel<sup>2</sup>, Yara Seif<sup>2</sup>, Zeyang Shen<sup>2</sup>, Bernhard O. Palsson<sup>2,3,4,5,\*</sup>

6  
7 1 Department of Biological Sciences, University of California San Diego, La Jolla, CA,  
8 92093, USA

9 2 Department of Bioengineering, University of California San Diego, La Jolla, CA,  
10 92093, USA

11 3 Department of Pediatrics, University of California San Diego, La Jolla, CA, 92093,  
12 USA

13 4 Bioinformatics and Systems Biology Program, University of California San Diego, La  
14 Jolla, CA 92093, USA.

15 5 Novo Nordisk Foundation Center for Biosustainability, 2800, Kongens Lyngby,  
16 Denmark

17  
18 \*Correspondence should be addressed to: Palsson O. Bernhard, Email:  
19 [palsson@ucsd.edu](mailto:palsson@ucsd.edu).

20  
21  
22  
23  
24  
25  
26  
27  
28  
29

## 30 Abstract

31 CodY is a conserved broad acting transcription factor that regulates the expression of  
32 genes related to amino acid metabolism and virulence in methicillin-resistant  
33 *Staphylococcus aureus* (MRSA). CodY target genes have been studied by using *in vitro*  
34 DNA affinity purification and deep sequencing (IDAP-Seq). Here we performed the first *in*  
35 *vivo* determination of CodY target genes using a novel CodY monoclonal antibody in  
36 established ChIP-exo protocols. Our results showed, 1) the same 135 CodY promoter  
37 binding sites regulating 165 target genes identified in two closely related virulent *S.*  
38 *aureus* USA300 TCH1516 and LAC strains; 2) The differential binding intensity for the  
39 same target genes under the same conditions was due to sequence differences in the  
40 same CodY binding site in the two strains; 3) Based on transcriptomic data, a CodY  
41 regulon comprising 72 target genes that are differentially regulated relative to a CodY  
42 deletion strain, representing genes that are mainly involved in amino acid transport and  
43 metabolism, inorganic ion transport and metabolism, transcription and translation, and  
44 virulence; and 4) CodY systematically regulated central metabolic flux to generate  
45 branched-chain amino acids (BCAAs) by mapping the CodY regulon onto a genome-  
46 scale metabolic model of *S. aureus*. Our study performed the first system-level analysis  
47 of CodY in two closely related USA300 TCH1516 and LAC strains giving new insights  
48 into the similarities and differences of CodY regulatory roles between the closely related  
49 strains.

## 50 Importance

51 With the increasing availability of whole genome sequences for many strains within the  
52 same pathogenic species, a comparative analysis of key regulators is needed to  
53 understand how the different strains uniquely coordinate metabolism and expression of  
54 virulence. To successfully infect the human host, *Staphylococcus aureus* USA300 relies  
55 on the transcription factor CodY to reorganize metabolism and express virulence factors.  
56 While CodY is a known key transcription factor, its target genes are not characterized on  
57 a genome-wide basis. We performed a comparative analysis to describe the  
58 transcriptional regulation of CodY between two dominant USA300 strains. This study  
59 motivates the characterization of common pathogenic strains and an evaluation of the  
60 possibility of developing specialized treatments for major strains circulating in the  
61 population.

## 62 Key words

63 *Staphylococcus aureus*, CodY, Transcription factor binding sites, Metabolism

64

## 65 Introduction

66 *Staphylococcus aureus* is a ubiquitous, Gram-positive pathogen that causes a diverse  
67 range of bacterial infections, from skin and soft tissue infections to potentially fatal  
68 infections, such as pneumonia, endocarditis, osteomyelitis, sepsis, and toxic shock  
69 syndrome (1). Coupled with the growing prevalence of methicillin-resistant *S. aureus*  
70 (MRSA) strains, the worldwide threat posed by this pathogen is obvious (2). Current  
71 research provides insights into important features of these strains, including antibiotic  
72 resistance and extensive virulence factors. So far, a number of known virulence factors  
73 consist of surface-associated proteins, such as microbial surface components, and  
74 secreted proteins, like hemolysins, immunomodulators, and many exoenzymes (3). To  
75 combat the worldwide spread of *S. aureus*, significant effort is being focused on the  
76 investigation of the transcription factors that control virulence factors during infection (4,  
77 5). With different strains circulating in the population, it is important to understand the  
78 fundamental differences between them.

79

80 CodY is an important broad acting transcription factor in *S. aureus* (6, 7). While the  
81 primary known role of CodY is to regulate the metabolic genes in response to cellular  
82 branched chain amino acid and GTP concentrations, it also controls the expression of  
83 several virulence factors, acting as a bridge between metabolism and virulence (6, 8–11).  
84 The CodY regulon, estimated to consist of 150 to more than 200 genes, can vary in size  
85 between *S. aureus* strains, and CodY can even have opposite effects on the expression  
86 of the same gene in different strains (10, 12, 13). At present, direct determination of CodY

87 DNA-binding sites using ChIP-exo and the identification of the corresponding target  
88 genes has not been achieved.

89

90 To address this challenge, we developed a reliable ChIP-grade monoclonal antibody and  
91 conducted *in vivo* genome-wide experiments (ChIP-exo) to identify 165 identical CodY  
92 target genes in two common *S. aureus* USA300 isolates (TCH1516 and LAC). To  
93 reconstruct the CodY regulon, we compared RNA-seq profiles of the wild-type strain and  
94 *codY* mutant. To examine the network level effects of CodY, we used a genome-scale  
95 metabolic model to simulate the flux state of central carbon metabolism, demonstrating  
96 the regulatory activities of CodY to generate BCAA. Our study used a comprehensive  
97 pipeline to characterize the CodY regulon between closely related USA300 substrains  
98 that included genetic parameters and network level computational models.

99

100

101

## 102 Results

### 103 Comparative genomic analysis of *S. aureus* USA300 reveals a high 104 level of identity between two closely related strains, TCH1516 and 105 LAC

106 The community-associated methicillin-resistant *S. aureus* (CA-MRSA) clones belonging  
107 to the USA300 lineage have become the dominant sources of MRSA in the United States  
108 (14). They are distinct from other *S. aureus* clones such as USA200 (UAMS-1), USA400  
109 (MW2), and ST8 MSSA (Newman) (14). Two dominant CA-MRSA USA300 strains,  
110 TCH1516 and LAC, isolated in Los Angeles and Houston, respectively, were chosen to  
111 study CA-MRSA clones as they represent well characterized strains in the USA300  
112 lineage (15). These strains have become the epidemic clones spreading in the community  
113 (16).

114  
115 First, using whole-genome alignment, we characterized the genomes of TCH1516 and  
116 LAC, with lengths of ~2.872 Mb and ~2.878 Mb, respectively (**Table 1**). We found a high  
117 level of identity at the nucleotide level between these two closely related strains, and on  
118 average, they displayed 99.5% identity for all coding genes (**Figure 1A**). Further,  
119 MUMmer was used to check for the synteny between the strains. We produced a  
120 MUMmer dot plot resulting from the alignment of their chromosomal sequences,  
121 demonstrating that they have high similarity between the genomes and large scale  
122 inversions located at positions ~ 2.18 Mb (TCH1516) and ~ 2.20 Mb (LAC) (**Figure 1B**).

123 Overall, these data revealed that they have a high degree of sequence similarity  
124 throughout their genome sequences.

## 125 Genome-wide identification of CodY-binding sites in *S. aureus* 126 USA300 TCH1516

127 Previously, 57 CodY-binding sites in the *S. aureus* clinical strain UAMS-1 were identified  
128 *in vitro* deploying an affinity purification experiment using purified *S. aureus* His-tagged  
129 CodY and a related mutant strain (8). However, there are no direct *in vivo* measurements  
130 of the interaction between CodY and DNA in the recent USA300 isolates. Thus, using a  
131 novel monoclonal antibody, we performed Chromatin immunoprecipitation followed by  
132 exonuclease digestion (ChIP-exo) to identify the CodY-binding sites with single nucleotide  
133 resolution in *S. aureus* USA300 TCH1516 under RPMI with 10% LB medium (17).

134  
135 Using a peak calling algorithm (MACE), a total of 165 CodY target genes (135 binding  
136 peaks) were identified from TCH1516 (**Figure 2A, upper panel**). As mentioned before,  
137 there were 57 CodY target genes identified in *S. aureus* UAMS-1 using IDAP-Seq, 57%  
138 (36/57) of which were also detected in TCH1516. Compared to the IDAP-Seq approach,  
139 this study detected the interaction between TF-DNA *in vivo* to enrich the DNA bound by  
140 CodY in its natural state, but also showed the location of each peak at single nucleotide  
141 resolution.

142  
143 Our results showed that 88% (144/165) of CodY binding sites were located within the  
144 intergenic regions, and the remaining 12% of binding sites were found in coding regions

145 **(Figure 2B, upper panel)**. Most of the binding sites located in intergenic regions were  
146 present upstream of assigned genes, indicating that CodY may play critical regulatory  
147 roles in the expression of these genes. A total of 128 novel CodY target genes were  
148 identified **(Figure 2B, bottom panel)**. These findings expanded the list of CodY target  
149 genes in TCH1516 and enabled a better understanding of the global regulatory role of  
150 CodY in the USA300 lineage.

## 151 Identification of the CodY-binding motif in *S. aureus* TCH1516

152 To identify the DNA sequence motif of CodY-binding sites, we used the MEME motif-  
153 searching algorithm with the genomic sequences of binding sites, and then identified the  
154 conserved 20-bp CodY binding motif, which was consistent with the previously  
155 characterized CodY DNA-binding consensus sequence (AATTTTCWGAAAATT) in *S.*  
156 *aureus* UAMS-1 **(Figure 2C)**. Furthermore, the *S. aureus* TCH1516 CodY binding motif  
157 is similar with the CodY binding motif (AATTTTCWGAATATTCWGAAAATT) reported in  
158 *Listeria monocytogenes* and *Bacillus subtilis* (18, 19). These results suggest that CodY  
159 likely has a conserved DNA-binding domain in Gram-positive bacteria **(Supplementary**  
160 **Figure 1)**.

## 161 Comparison of *in vivo* CodY-binding sites in *S. aureus* TCH1516 162 and LAC strains

163 As two community-associated methicillin-resistant strains, *S. aureus* TCH1516 and LAC  
164 have an identical CodY sequence **(Supplementary Figure 2)**. To investigate the direct



165 gene targets of CodY, we employed the same monoclonal antibody to perform the ChIP-  
166 exo assay in *S. aureus* LAC under RPMI with 10% LB medium (17).

167

168 *S. aureus* LAC has 165 CodY target genes identified at the genome that were identical to  
169 those from the TCH1516 strain, though their positions at each chromosome are different  
170 due to the inversions mentioned earlier (**Figure 2A, bottom panel**). The alignment of the  
171 binding motifs revealed that the two strains have 18 nucleotides overlap ( $p$ -value= 9.35e-  
172 09) (**Supplementary Figure 3**). Among the 165 target genes, there are ten genes directly  
173 related to virulence in *S. aureus* TCH1516 and LAC strains (**Table 2**), consistent with the  
174 report that CodY links metabolism with virulence gene expression (6). Taken together,  
175 these data demonstrated that the global regulator CodY controls the expression of  
176 metabolism and virulence genes in *S. aureus* (9).

## 177 Strain-specific binding intensity is associated with DNA sequence 178 variations in the binding site CodY

179 Though the genome-wide CodY binding sites identified were the same in the two strains,  
180 we found that strain-specific binding peaks had differing intensities (**Supplementary**  
181 **Figure 4**). The data showed that some of the binding peaks in TCH1516 had a higher  
182 intensity for CodY than those in LAC, and vice versa. 45 of 135 binding sites had identical  
183 DNA sequences (**Supplementary Figure 5**).

184

185 To fully evaluate whether the strain-specific binding peaks are due to the changes in the  
186 sequence-specific affinity to which CodY is bound, we first identified a 20-bp motif based

187 on a merged set of CodY binding peaks from the strains using MEME (20)  
188 (**Supplementary figure 6**). We then utilized the computational method MAGGIE to  
189 measure differences in the DNA sequence in paired binding sites in the two strains (21).  
190 Among 135 pairs of peaks between the strains, 33.3% (45/135) had a range of motif score  
191 difference between -1 and 1. We plotted the pairs of peak heights for the 135 shared  
192 binding sites in LAC and TCH1516 (**Figure 3A**). When we highlighted the 45 binding sites  
193 with near identical DNA sequences, we observed that they represent the dots closest to  
194 the 45 degree line. This shows that these 45 sites have similar peak heights in the two  
195 strains. The binding sites where the DNA sequence differs are off the 45 degree line,  
196 showing that these differences lead to differential peak heights for the same binding site  
197 in the two strains.

198  
199 Further, to visualize the differences between a pair of binding peaks, we mapped CodY  
200 binding peaks to the reference genome. For example, the sequence of the peak located  
201 at the upstream of gene *yocS* in TCH1516 slightly (8 bp) overlaps the corresponding peak  
202 sequence in LAC (**Figure 3B**). Another example is from a pair of peaks from unknown  
203 genes USA300HOU\_RS01765 and ERW10\_08770. They had zero motif score  
204 difference, and thus we observed that both peak sequences nearly overlap each other  
205 (**Figure 3C**).

## 206 Genome-wide reconstruction of CodY regulons in the *S. aureus* 207 USA300 lineage

208 The ChIP-exo datasets from this study expanded the size of target genes to 165 in *S.*  
209 *aureus* USA300 lineage, which included 128 novel CodY target genes. Of these, 37% (47  
210 of 128) were metabolic genes. Nearly all of these 47 metabolic genes were non-essential  
211 genes in *S. aureus* USA300.

212  
213 To further characterize the regulatory roles of CodY in the *S. aureus* USA300 lineage, we  
214 compared gene expression profiling of the *codY* mutant to that of the wild type under  
215 RPMI with 10% LB medium, and found there were 809 genes differentially expressed in  
216 the *codY* mutant (at least 2-fold change ( $P < 0.05$ ) in RNA-seq expression) (**Figure 4A,**  
217 **Supplementary Figure 7**). The majority of genes related to metabolism were up-  
218 regulated in the *codY* mutant, which was consistent with the repressor role that CodY  
219 plays in *S. aureus* (22). Further, we used functional enrichment analysis by Clusters of  
220 Orthologous Groups (COG) classification of 809 differentially expressed genes to  
221 discover the top six differential enrichment pathways: amino acid transporter and  
222 metabolism, inorganic ion transport and metabolism, translation, ribosomal structure and  
223 biogenesis, transcription, carbohydrate transport and metabolism, and energy production  
224 and conversion (**Figure 4B**).

225  
226 Next, to reconstruct the CodY regulon, we compared the expression profiling of the *codY*  
227 mutant to the wild type strain. Combining genome-wide target genes with transcriptomics,  
228 we expanded the size of CodY regulons to 72 target genes that were directly regulated

229 by CodY (**Figure 4C**). Over half of the regulons (51%, 37 of 72) were related to the  
230 metabolic pathways (amino acid transport and metabolism, inorganic ion transport and  
231 metabolism, and energy production/conversion). In addition, 57% (41 of 72) of regulons  
232 were negatively regulated by CodY in the wild type. We also found that 90% (65/72) of  
233 CodY regulons had been identified in the CodY iModulon, which confirmed the regulatory  
234 roles of CodY (**Supplementary Figure 8**) (23). Further, CodY regulons were directly  
235 involved in signal transduction mechanisms, transcription, translation, post-translational  
236 modification, and defense mechanisms. These data indicated that CodY contributes to  
237 global regulatory roles beyond the metabolism of *S. aureus* USA300.

## 238 Rerouting of flux through central carbon metabolism to generate 239 the branched-chain amino acids (BCAAs)

240 CodY is reported to regulate the expression of metabolic genes in response to changes  
241 in the pools of specific metabolites, i.e., the branched-chain amino acids (BCAAs;  
242 isoleucine, leucine, and valine (ILV) and nucleoside triphosphate GTP), to regulate genes  
243 involved in the biosynthesis these amino acids (24). In addition to providing building  
244 blocks for proteins, BCAAs are also incorporated into the membrane as a part of branched  
245 chain fatty acids (BCFAs) (25). Therefore, sufficient uptake or biosynthesis of BCAAs is  
246 a key component of cellular homeostasis. Analysis of the codY iModulon and ChIP-exo  
247 data indicated that codY directly regulates genes required for both the transport and  
248 biosynthesis of BCAAs. For many other amino acids (e.g. histidine, aspartate, threonine),  
249 our data indicates that codY only directly regulates their biosynthetic genes and not their  
250 transport. Therefore, we sought to understand how *S. aureus* deals with BCAA starvation.

251  
252 In order to understand the partition of fluxes required for BCAA synthesis we utilized  
253 parsimonious Flux Balance Analysis (pFBA), using a previously published metabolic  
254 model of *S. aureus* USA300 (26, 27). pFBA determines metabolic fluxes that maximize  
255 growth while minimizing the sum of fluxes through the system (28). Simulated growth in  
256 RPMI supplemented with BCAA led to growth with zero flux through the BCAA  
257 biosynthetic pathway in favor of direct transporters of the necessary metabolites.  
258 However, restricting flux through all BCAA transporters (see Materials and Methods), led  
259 to a spike in flux through the biosynthetic enzymes (**Figure 5**). Interestingly, aspartate, a  
260 precursor to isoleucine biosynthesis, was not generated by the TCA cycle intermediate  
261 oxaloacetate. Instead, aspartate was derived from the breakdown of asparagine, while  
262 flux through the TCA cycle was redirected towards generating pyruvate via malate. This  
263 result indicated that in the presence of sufficient asparagine and aspartate in the media,  
264 *S. aureus* generates pyruvate to increase precursor pools available for isoleucine  
265 biosynthesis. Indeed, flux through the two enzymes linking the TCA cycle and aspartate,  
266 malate dehydrogenase, and aspartate transaminase, increased when aspartate and  
267 asparagine transporters were blocked in addition to BCAA biosynthesis.

## 268 Discussion

269 With the increasing number of whole genome sequences becoming available for multiple  
270 strains of a pathogenic species, the importance of the differences in their genomes and  
271 gene content is becoming more appreciated (29). Although many properties of pathogenic  
272 strains can now be predicted from sequence alone (30–32), detailed experimental

273 characterization of differences for multiple strains is also needed. In this study, we  
274 combined genome-wide experiments and computational modeling to address the  
275 differences of CodY in the dominant CA-MRSA USA300 clinical isolates TCH1516 and  
276 LAC (15).

277

278 The study resulted in a series of significant findings. First, through the genome genome-  
279 wide identification of binding sites, we found the same 165 CodY target genes in both  
280 strains. Second, an examination of the differential binding intensity for the same target  
281 genes under the same conditions revealed that the variance was due to DNA sequence  
282 differences in the same CodY binding site in the two strains, while the *codY* protein was  
283 identical. This finding gives insights into the system-level analysis of CodY target genes  
284 and differential binding intensity across closely related strains. Third, the study identified  
285 ten virulence genes that belong to different types of virulence factors, which demonstrated  
286 that CodY connects metabolism genes with virulence genes in *S. aureus* (6). Considering  
287 that different *S. aureus* lineages may have distinct virulence factors, we could expand this  
288 study to identify many other virulence factor genes coordinated by CodY across different  
289 *S. aureus* strains. Finally, a genome-scale model of the metabolic network can be  
290 constrained by the regulatory action of CodY, and the results show the subsequent  
291 systematic rerouting of metabolism and pathway use.

292

293 Taken together, this study demonstrates, for the first time, the differences in the function  
294 of a conserved globally acting transcription factor (e.g., CodY) between closely related  
295 pathogenic strains. These results enable a wider range of studies to further decipher both

296 subtle and major differences between the phenotypes of sequenced strains. This study  
297 motivates the characterization of common pathogenic strains and an evaluation of the  
298 possibility of developing specialized treatments for major strains circulating in the  
299 population.

## 300 **Materials and Methods**

### 301 **Bacterial strains, plasmids, and culture conditions**

302 The bacterial strains used in this study were described in Dataset 1. Methicillin-resistant  
303 *Staphylococcus aureus* (MRSA) strain substr. USA300 TCH1516 (also named USA300-  
304 HOU-MR) was originally isolated from an outbreak in Houston, Texas and caused severe  
305 invasive disease in adolescents (33). MRSA USA300 LAC was originally isolated from  
306 the Los Angeles county jail (15). *S. aureus* JE2, as a parental strain, was used for all  
307 sequence-defined Tn mutagenesis experiments. *CodY* mutant was from the Nebraska  
308 Transposon Mutant Library in which each of non-essential genes were disrupted via  
309 mariner Tn mutagenesis. All *S. aureus* strains were grown in tryptic soy broth (TSB,  
310 Sigma-Aldrich) or RPMI-1640 (Gibco) with 10% Lysogeny broth (LB, Sigma-Aldrich, MO)  
311 containing 10 g/L peptone, 5 g/L yeast extract, 10 g/L NaCl with the appropriate antibiotics  
312 for plasmid maintenance or selection (ampicillin, 100 ug/mL; chloramphenicol, 10 ug/mL)  
313 with shaking (250 rpm) at 37°C, maintaining a flask-to-medium volume ratio of 9:1, unless  
314 otherwise specified.

315

### 316 **Monoclonal antibody**

317 The entire *S. aureus* CodY coding sequence was amplified, and introduced into *E. coli*  
318 BL21. The resulting glutathione-S-transferase (GST):: phoP fusion constructs were  
319 verified by DNA sequencing. To obtain the GST fusion proteins, *E. coli* cells were grown  
320 in 2 × YT medium at 30°C in an orbital shaker (180 rpm) to an OD<sub>600</sub> of 0.6. Expression  
321 was induced with IPTG (0.1 mM final concentration) for 5 h. Cells were harvested by  
322 centrifugation, washed twice with PBS, lysed by sonication and then mixed with  
323 Glutathione Sepharose-4B beads (Pharmacia Biotech). Proteins were eluted with 10 mM  
324 reduced glutathione (in 50 mM Tris·HCl, pH 8.0) following the manufacturer's  
325 recommendations and conserved in 40% glycerol at -80°C before use. Monoclonal anti-  
326 CodY antibody was generated by injection of CodY into the BALB/C mouse (Genscript,  
327 USA). Mouse anti-CodY IgG monoclonal antibody (IgG) was generated and purified  
328 (Genscript, USA).

329

### 330 **ChIP-exo experiments**

331 ChIP-exo experimentation was performed following the procedures described previously  
332 (34). To identify CodY binding maps for each strain *in vivo*, the DNA bound to CodY from  
333 formaldehyde cross-linked cells were isolated by chromatin immunoprecipitation (ChIP)  
334 with the specific antibodies that specifically recognize CodY (Genscript, USA), and  
335 Dynabeads Pan Mouse IgG magnetic beads (Invitrogen) followed by stringent washings



336 as described previously. ChIP materials (chromatin-beads) were used to perform on-bead  
337 enzymatic reactions of the ChIP-exo method. Briefly, the sheared DNA of chromatin-  
338 beads was repaired by the NEBNext End Repair Module (New England Biolabs) followed  
339 by the addition of a single dA overhang and ligation of the first adaptor (5'-phosphorylated)  
340 using dA-Tailing Module (New England Biolabs) and NEBNext Quick Ligation Module  
341 (New England Biolabs), respectively. Nick repair was performed by using PreCR Repair  
342 Mix (New England Biolabs). Lambda exonuclease- and RecJf exonuclease-treated  
343 chromatin was eluted from the beads and overnight incubation at 65 °C reversed the  
344 protein-DNA cross-link. RNAs- and Proteins-removed DNA samples were used to  
345 perform primer extension and second adaptor ligation with following modifications. The  
346 DNA samples incubated for primer extension as described previously were treated with  
347 dA-Tailing Module (New England Biolabs) and NEBNext Quick Ligation Module (New  
348 England Biolabs) for second adaptor ligation. The DNA sample purified by GeneRead  
349 Size Selection Kit (Qiagen) was enriched by polymerase chain reaction (PCR) using  
350 Phusion High-Fidelity DNA Polymerase (New England Biolabs). The amplified DNA  
351 samples were purified again by GeneRead Size Selection Kit (Qiagen) and quantified  
352 using Qubit dsDNA HS Assay Kit (Life Technologies). Quality of the DNA sample was  
353 checked by running Agilent High Sensitivity DNA Kit using Agilent 2100 Bioanalyzer  
354 (Agilent) before sequenced using HiSeq 2500 (Illumina) following the manufacturer's  
355 instructions. Each modified step was also performed following the manufacturer's  
356 instructions. ChIP-exo experiments were performed in biological duplicates.

357

358 **Peak calling for ChIP-exo dataset**

359 Peak calling was performed as previously described (34). Sequence reads generated  
360 from ChIP-exo were mapped onto the reference genome using bowtie (35) with default  
361 options to generate SAM output files. MACE program was used to define peak candidates  
362 from biological duplicates for each experimental condition with sequence depth  
363 normalization (36). To reduce false-positive peaks, peaks with signal-to-noise (S/N) ratio  
364 less than 1.5 were removed. The noise level was set to the top 5% of signals at genomic  
365 positions because top 5% makes a background level in a plateau and top 5% intensities  
366 from each ChIP-exo replicates across conditions correlate well with the total number of  
367 reads (34, 37, 38). The calculation of S/N ratio resembles the way to calculate ChIP-chip  
368 peak intensity where IP signal was divided by Mock signal. Genome-scale data were  
369 visualized using MetaScope.

370 (<https://sites.google.com/view/systemskimlab/software?authuser=0>)

371

### 372 **Motif search from ChIP-exo peaks**

373 The sequence motif analysis for CodY binding sites was performed using the MEME  
374 software suite (20). For each strain, sequences in binding regions were extracted from  
375 the reference genome (*S. aureus* TCH1516: GenBank: NC\_010079.1, NC\_012417.1,  
376 and NC\_010063.1; *S. aureus* LAC: GenBank: CP035369.1 and CP035370.1). To achieve  
377 a more accurate motif, the sequence of each binding site was extended by 10bp at each  
378 end. The width parameter was fixed at 20bp and the minsites parameter was fixed at 90%  
379 of the total number of the sequence. All other parameters followed the default setting.

380

### 381 **Clusters of Orthologous groups (COGs) enrichment**

382 CodY regulons were categorized according to their annotated COG database (39).  
383 Functional groups in core, accessory, and unique CodY-regulated genes were  
384 determined by COG categories.

385

### 386 **Multiple genome comparison and alignment**

387 MUMmer was used to run the complete nucleotide based alignments to check for synteny  
388 amongst the sequences (40). BLAST Ring Image Generator (BRIG) was used to show a  
389 genome wide visualization of coding sequences identity between *S. aureus* USA300  
390 TCH1516 and LAC (41). Multiple genomes were analyzed by the M-GCAT, which is a  
391 tool for rapidly visualizing and aligning the most highly conserved regions in multiple  
392 prokaryote genomes. M-GCAT is based on a highly efficient approach to anchor-based  
393 multiple genome comparison using a compressed suffix graph (42).

394

### 395 **Determining Core Genome with Bidirectional BLAST Hits**

396 To combine the data from the two strains, core genome-containing conserved genes  
397 between the LAC (GenBank: CP035369.1 and CP035370.1) and TCH1516 (GenBank:  
398 NC\_010079.1, NC\_012417.1, and NC\_010063.1) were first established using  
399 bidirectional BLAST hits (43). In this analysis, all protein sequences of CDS from both  
400 genomes are BLASTed against each other twice with each genome acting as reference  
401 once. Two genes were considered conserved (and therefore part of the core genome) if  
402 1) the two genes have the highest alignment percent to each other than to any other  
403 genes in the genome, and 2) the coverage is at least 80%.

404

## 405 **RNA Extraction and Library Preparation**

406 *S. aureus* USA300 isolates JE2, and its derivatives of *codY* mutant were used for this  
407 study. The growth conditions and RNA preparation methods for data acquired from Choe  
408 et al. has been previously described(44). Detailed growth conditions, RNA extraction, and  
409 library preparation methods for other samples have also been already described (45).  
410 Briefly, an overnight culture of *S. aureus* was used to inoculate a preculture and were  
411 grown to mid-exponential growth phase (OD600 = 0.4) in RPMI+10%LB medium. Once  
412 in the mid-exponential phase, the preculture was used to inoculate the media containing  
413 appropriate supplementation or perturbations. All samples were collected in biological  
414 duplicates, originating from different overnight cultures. Samples for control conditions  
415 were collected for each set to account for batch effect.

416

## 417 **RNA-Seq Data Processing**

418 The RNA-seq pipeline used to analyze and perform QC/QA has been described in detail  
419 previously (45). Briefly, the sequences were aligned to respective genomes, JE2, LAC or  
420 TCH1516, using Bowtie2 (46). The aligned sequences were assigned to ORFs using  
421 HTSeq-counts (47). Differential expression analysis was performed using DESeq2 with a  
422 P-value threshold of 0.05 and an absolute fold-change threshold of 2 (48). To create the  
423 final counts matrix, counts from conserved genes in LAC samples were represented by  
424 the corresponding ortholog in TCH1516. The counts for accessory genes were filled with  
425 0s if the genes were not present in the strain (i.e., LAC-specific genes had counts of 0 in  
426 TCH1516 samples and vice versa). Finally, to reduce the effect of noise, genes with

427 average counts per sample <10 were removed. The final counts matrix with 2,581 genes  
428 was used to calculate transcripts per million (TPM).

429

### 430 **Metabolic modeling and assessment of significant differences in flux distribution**

431 We used BiGG model iYS854 and set the lower bound to the corresponding nutrient  
432 exchange to -1 mmol/gDW/h (the negative sign is a modeling convention to allow for the  
433 influx of nutrients) and -13 mmol/gDW/h for oxygen exchange (as measured  
434 experimentally) (27). Next, we compared two conditions with: 1) amino acid rich medium  
435 and 2) amino acid poor medium. In the first condition, assuming that in the presence of  
436 amino acid, CodY mediates the repression of multiple target genes. Specifically, we  
437 turned off the set of 65 reactions that CodY regulated related to biosynthetic pathways.  
438 No regulatory constraints were added. FBA was implemented with the biomass formation  
439 set as the functional network objective. Next, flux balance analysis was run in both  
440 conditions and the fluxes were sampled 10,000 times. All reaction fluxes were normalized  
441 by dividing by the growth rate to account for growth differences across the two media  
442 types. The flux distribution for each metabolic process was compared across both  
443 conditions using the Kolmogorov-Smirnov test, a non-parametric test which compares  
444 two continuous probability distributions. The distribution across two reactions was  
445 deemed to be significantly different when the Kolmogorov-Smirnoff statistic was larger  
446 than 0.99 with an adjusted p-value < 0.01.

447

### 448 **Motif mutation analysis**

449 To gain insights into the CodY motifs from TCH1516 and LAC strains, MAGGIE was used  
450 for motif mutation analysis (21). For CodY, given a pair of CodY binding sequences of the  
451 same target gene from TCH1516 and LAC strains, the peak sequence with a higher  
452 binding intensity was considered as a positive sequence; the other one with a lower  
453 binding intensity was considered as a negative sequence. Here, CodY has 135 pairs of  
454 positive and negative sequences from TCH1516 and LAC. MAGGIE computes  
455 differences of representative motif scores (i.e., motif mutations) within each sequence  
456 pair by subtracting the maximal scores of negative from positive sequences and then  
457 statistically tests for the association between motif mutations and the differences in CodY  
458 binding intensity. Positive significant p-values from MAGGIE indicate that higher-affinity  
459 motif is associated with stronger CodY binding.

## 460 Data availability

461 The ChIP-exo and RNA-seq datasets are accessible through GEO under accession  
462 number GSE159856 (review token: clgbaokcxhujhmt) and GSE163312 (review token:  
463 qfsvcukmnpwlvmb).

## 464 Acknowledgements

465 We thank Richard Szubin for help with ChIP-exo library sequencing, Charles J. Norsigian  
466 for the insights about flux balance analysis of CodY, and Marc Abrams for reviewing and  
467 editing the manuscript.

## 468 Funding

469 This work was funded by the Novo Nordisk Foundation Center for Biosustainability  
470 (Grant Number NNF10CC1016517) and the NIH NIAID (Grant number U01AI124316)



## 472 References

- 473 1. Bagnoli F, Rappuoli R, Grandi G. 2018. *Staphylococcus aureus*: Microbiology,  
474 Pathology, Immunology, Therapy and Prophylaxis. Springer.
- 475 2. Medved'ová A, Györiová R. 2019. Prevalence of *Staphylococcus aureus* and  
476 antibiotic resistant *Staphylococcus aureus* in public transport in Bratislava,  
477 Slovakia. *Acta Chimica Slovaca*.
- 478 3. Chen S-Y, Liao C-H, Wang J-L, Chiang W-C, Lai M-S, Chie W-C, Chen W-J,  
479 Chang S-C, Hsueh P-R. 2012. Methicillin-resistant *Staphylococcus aureus* (MRSA)  
480 staphylococcal cassette chromosome mec genotype effects outcomes of patients  
481 with healthcare-associated MRSA bacteremia independently of vancomycin  
482 minimum inhibitory concentration. *Clin Infect Dis* 55:1329–1337.
- 483 4. Kane TL, Carothers KE, Lee SW. 2018. Virulence Factor Targeting of the Bacterial  
484 Pathogen *Staphylococcus aureus* for Vaccine and Therapeutics. *Curr Drug Targets*  
485 19:111–127.
- 486 5. Chu AJ, Qiu Y, Harper R, Lin L, Ma C, Yang X. 2020. Nusbiarylins Inhibit  
487 Transcription and Target Virulence Factors in Bacterial Pathogen *Staphylococcus*  
488 *aureus*. *International Journal of Molecular Sciences*.
- 489 6. Pohl K, Francois P, Stenz L, Schlink F, Geiger T, Herbert S, Goerke C, Schrenzel  
490 J, Wolz C. 2009. CodY in *Staphylococcus aureus*: a regulatory link between  
491 metabolism and virulence gene expression. *J Bacteriol* 191:2953–2963.



- 492 7. Ibberson CB, Jones CL, Singh S, Wise MC, Hart ME, Zurawski DV, Horswill AR.  
493 2014. Staphylococcus aureus hyaluronidase is a CodY-regulated virulence factor.  
494 Infect Immun 82:4253–4264.
- 495 8. Majerczyk CD, Dunman PM, Luong TT, Lee CY, Sadykov MR, Somerville GA, Bodi  
496 K, Sonenshein AL. 2010. Direct targets of CodY in Staphylococcus aureus. J  
497 Bacteriol 192:2861–2877.
- 498 9. Waters NR, Samuels DJ, Behera RK, Livny J, Rhee KY, Sadykov MR, Brinsmade  
499 SR. 2016. A spectrum of CodY activities drives metabolic reorganization and  
500 virulence gene expression in *Staphylococcus aureus*. Mol Microbiol 101:495–514.
- 501 10. Basu A, Shields KE, Eickhoff CS, Hoft DF, Yap M-NF. 2018. Thermal and  
502 nutritional regulation of ribosome hibernation in Staphylococcus aureus. J Bacteriol  
503 <https://doi.org/10.1128/JB.00426-18>.
- 504 11. Roux A, Todd DA, Velázquez JV, Cech NB, Sonenshein AL. 2014. CodY-mediated  
505 regulation of the Staphylococcus aureus Agr system integrates nutritional and  
506 population density signals. J Bacteriol 196:1184–1196.
- 507 12. Pohl K, Francois P, Stenz L, Schlink F, Geiger T, Herbert S, Goerke C, Schrenzel  
508 J, Wolz C. 2009. CodY in Staphylococcus aureus: a regulatory link between  
509 metabolism and virulence gene expression. J Bacteriol 191:2953–2963.
- 510 13. Majerczyk CD, Dunman PM, Luong TT, Lee CY, Sadykov MR, Somerville GA, Bodi  
511 K, Sonenshein AL. 2010. Direct targets of CodY in Staphylococcus aureus. J  
512 Bacteriol 192:2861–2877.

- 513 14. Thurlow LR, Joshi GS, Richardson AR. 2012. Virulence strategies of the dominant  
514 USA300 lineage of community-associated methicillin-resistant *Staphylococcus*  
515 *aureus* (CA-MRSA). *FEMS Immunol Med Microbiol* 65:5–22.
- 516 15. Vitko NP, Richardson AR. 2013. Laboratory maintenance of methicillin-resistant  
517 *Staphylococcus aureus* (MRSA). *Curr Protoc Microbiol* Chapter 9:Unit 9C.2.
- 518 16. Kennedy AD, Porcella SF, Martens C, Whitney AR, Braughton KR, Chen L, Craig  
519 CT, Tenover FC, Kreiswirth BN, Musser JM, DeLeo FR. 2010. Complete nucleotide  
520 sequence analysis of plasmids in strains of *Staphylococcus aureus* clone USA300  
521 reveals a high level of identity among isolates with closely related core genome  
522 sequences. *J Clin Microbiol* 48:4504–4511.
- 523 17. Wijesinghe G, Dilhari A, Gayani B, Kottegoda N, Samaranayake L, Weerasekera  
524 M. 2019. Influence of Laboratory Culture Media on in vitro Growth, Adhesion, and  
525 Biofilm Formation of *Pseudomonas aeruginosa* and *Staphylococcus aureus*. *Med*  
526 *Princ Pract* 28:28–35.
- 527 18. Biswas R, Sonenshein AL, Belitsky BR. 2020. Genome-wide identification of  
528 *Listeria monocytogenes* CodY-binding sites. *Mol Microbiol* 113:841–858.
- 529 19. Belitsky BR, Sonenshein AL. 2013. Genome-wide identification of *Bacillus subtilis*  
530 CodY-binding sites at single-nucleotide resolution. *Proc Natl Acad Sci U S A*  
531 110:7026–7031.
- 532 20. Bailey TL, Boden M, Buske FA, Frith M, Grant CE, Clementi L, Ren J, Li WW,  
533 Noble WS. 2009. MEME SUITE: tools for motif discovery and searching. *Nucleic*

- 534           Acids Res 37:W202–8.
- 535   21. Shen Z, Hoeksema MA, Ouyang Z, Benner C, Glass CK. 2020. MAGGIE:  
536       leveraging genetic variation to identify DNA sequence motifs mediating  
537       transcription factor binding and function. *Bioinformatics* 36:i84–i92.
- 538   22. Majerczyk CD, Sadykov MR, Luong TT, Lee C, Somerville GA, Sonenshein AL.  
539       2008. *Staphylococcus aureus* CodY negatively regulates virulence gene  
540       expression. *J Bacteriol* 190:2257–2265.
- 541   23. Poudel S, Tsunemoto H, Seif Y, Sastry AV, Szubin R, Xu S, Machado H, Olson CA,  
542       Anand A, Pogliano J, Nizet V, Palsson BO. 2020. Revealing 29 sets of  
543       independently modulated genes in *Staphylococcus aureus*, their regulators, and  
544       role in key physiological response. *Proc Natl Acad Sci U S A* 117:17228–17239.
- 545   24. Brinsmade SR, Kleijn RJ, Sauer U, Sonenshein AL. 2010. Regulation of CodY  
546       activity through modulation of intracellular branched-chain amino acid pools. *J*  
547       *Bacteriol* 192:6357–6368.
- 548   25. Sen S, Sirobhusanam S, Johnson SR, Song Y, Tefft R, Gatto C, Wilkinson BJ.  
549       2016. Growth-Environment Dependent Modulation of *Staphylococcus aureus*  
550       Branched-Chain to Straight-Chain Fatty Acid Ratio and Incorporation of  
551       Unsaturated Fatty Acids. *PLoS One* 11:e0165300.
- 552   26. Lewis NE, Hixson KK, Conrad TM, Lerman JA, Charusanti P, Polpitiya AD, Adkins  
553       JN, Schramm G, Purvine SO, Lopez-Ferrer D, Weitz KK, Eils R, König R, Smith  
554       RD, Palsson BØ. 2010. Omic data from evolved *E. coli* are consistent with

- 555           computed optimal growth from genome-scale models. *Molecular Systems Biology*.
- 556   27. Seif Y, Monk JM, Mih N, Tsunemoto H, Poudel S, Zuniga C, Broddrick J, Zengler K,  
557           Palsson BO. 2019. A computational knowledge-base elucidates the response of  
558           *Staphylococcus aureus* to different media types. *PLoS Comput Biol* 15:e1006644.
- 559   28. Lewis NE, Hixson KK, Conrad TM, Lerman JA, Charusanti P, Polpitiya AD, Adkins  
560           JN, Schramm G, Purvine SO, Lopez-Ferrer D, Others. 2010. Omic data from  
561           evolved *E. coli* are consistent with computed optimal growth from genome-scale  
562           models. *Mol Syst Biol* 6:390.
- 563   29. Land M, Hauser L, Jun S-R, Nookaew I, Leuze MR, Ahn T-H, Karpinets T, Lund O,  
564           Kora G, Wassenaar T, Poudel S, Ussery DW. 2015. Insights from 20 years of  
565           bacterial genome sequencing. *Funct Integr Genomics* 15:141–161.
- 566   30. Monk JM, Charusanti P, Aziz RK, Lerman JA, Premyodhin N, Orth JD, Feist AM,  
567           Palsson BØ. 2013. Genome-scale metabolic reconstructions of multiple  
568           *Escherichia coli* strains highlight strain-specific adaptations to nutritional  
569           environments. *Proc Natl Acad Sci U S A* 110:20338–20343.
- 570   31. Monk JM, Lloyd CJ, Brunk E, Mih N, Sastry A, King Z, Takeuchi R, Nomura W,  
571           Zhang Z, Mori H, Feist AM, Palsson BO. 2017. iML1515, a knowledgebase that  
572           computes *Escherichia coli* traits. *Nat Biotechnol* 35:904–908.
- 573   32. Norsigian CJ, Danhof HA, Brand CK, Oezguen N, Midani FS, Palsson BO, Savidge  
574           TC, Britton RA, Spinler JK, Monk JM. 2020. Systems biology analysis of the  
575           *Clostridioides difficile* core-genome contextualizes microenvironmental evolutionary

- 576 pressures leading to genotypic and phenotypic divergence. NPJ Syst Biol Appl  
577 6:31.
- 578 33. Hultén KG, Kaplan SL, Gonzalez BE, Hammerman WA, Lamberth LB, Versalovic J,  
579 Mason EO Jr. 2006. Three-year surveillance of community onset health care-  
580 associated staphylococcus aureus infections in children. *Pediatr Infect Dis J*  
581 25:349–353.
- 582 34. Seo SW, Kim D, Latif H, O'Brien EJ, Szubin R, Palsson BO. 2014. Deciphering Fur  
583 transcriptional regulatory network highlights its complex role beyond iron  
584 metabolism in *Escherichia coli*. *Nat Commun* 5:4910.
- 585 35. Langmead B, Trapnell C, Pop M, Salzberg SL. 2009. Ultrafast and memory-efficient  
586 alignment of short DNA sequences to the human genome. *Genome Biol* 10:R25.
- 587 36. Wang L, Chen J, Wang C, Uusküla-Reimand L, Chen K, Medina-Rivera A, Young  
588 EJ, Zimmermann MT, Yan H, Sun Z, Zhang Y, Wu ST, Huang H, Wilson MD,  
589 Kocher J-PA, Li W. 2014. MACE: model based analysis of ChIP-exo. *Nucleic Acids*  
590 *Res* 42:e156.
- 591 37. Seo SW, Kim D, Szubin R, Palsson BO. 2015. Genome-wide Reconstruction of  
592 OxyR and SoxRS Transcriptional Regulatory Networks under Oxidative Stress in  
593 *Escherichia coli* K-12 MG1655. *Cell Rep* 12:1289–1299.
- 594 38. Ogasawara H, Ohe S, Ishihama A. 2015. Role of transcription factor NimR (YeaM)  
595 in sensitivity control of *Escherichia coli* to 2-nitroimidazole. *FEMS Microbiol Lett*  
596 362:1–8.

- 597 39. Tatusov RL, Galperin MY, Natale DA, Koonin EV. 2000. The COG database: a tool  
598 for genome-scale analysis of protein functions and evolution. *Nucleic Acids Res*  
599 28:33–36.
- 600 40. Delcher AL, Kasif S, Fleischmann RD, Peterson J, White O, Salzberg SL. 1999.  
601 Alignment of whole genomes. *Nucleic Acids Res* 27:2369–2376.
- 602 41. Alikhan N-F, Petty NK, Ben Zakour NL, Beatson SA. 2011. BLAST Ring Image  
603 Generator (BRIG): simple prokaryote genome comparisons. *BMC Genomics*.
- 604 42. Treangen TJ, Messeguer X. 2006. M-GCAT: interactively and efficiently  
605 constructing large-scale multiple genome comparison frameworks in closely related  
606 species. *BMC Bioinformatics* 7:433.
- 607 43. Overbeek R, Fonstein M, D'Souza M, Pusch GD, Maltsev N. 1999. The use of gene  
608 clusters to infer functional coupling. *Proc Natl Acad Sci U S A* 96:2896–2901.
- 609 44. Choe D, Szubin R, Dahesh S, Cho S, Nizet V, Palsson B, Cho B-K. 2018. Genome-  
610 scale analysis of Methicillin-resistant *Staphylococcus aureus* USA300 reveals a  
611 tradeoff between pathogenesis and drug resistance. *Sci Rep* 8:2215.
- 612 45. Poudel S, Tsunemoto H, Meehan M, Szubin R, Olson CA, Lamsa A, Seif Y, Dillon  
613 N, Vrbancac A, Sugie J, Dahesh S, Monk JM, Dorrestein PC, Pogliano J, Knight R,  
614 Nizet V, Palsson BO, Feist AM. 2019. Characterization of CA-MRSA TCH1516  
615 exposed to nafcillin in bacteriological and physiological media. *Sci Data* 6:43.
- 616 46. Langmead B, Salzberg SL. 2012. Fast gapped-read alignment with Bowtie 2.

617 Nature Methods.

618 47. Anders S, Pyl PT, Huber W. 2015. HTSeq--a Python framework to work with high-  
619 throughput sequencing data. *Bioinformatics* 31:166–169.

620 48. Love MI, Huber W, Anders S. 2014. Moderated estimation of fold change and  
621 dispersion for RNA-seq data with DESeq2. *Genome Biol* 15:550.

622

623 **FIGURE LEGENDS:**

624

625 **Figure 1 | The comparison of two dominant *Staphylococcus aureus* USA300**  
626 **isolates (TCH1516 and LAC).**

627 (A) Circular representation of whole genome comparison of *S. aureus* TCH1516 (internal  
628 ring) and LAC strains. Each ring of the circle represents a specific complete genome that  
629 corresponds to different colors in the legend on the right. The similarity between strains  
630 is represented by the intensity of the color. Darker colors represent higher similarities than  
631 lighter ones. Deleted regions are represented by blank spaces inside the circles. The  
632 whole genome comparisons were generated by BRIG. Alignment identity cutoffs of 0.8  
633 (upper) and 0.5 (lower) were used to determine missing regions in the query genome (*S.*  
634 *aureus* LAC) compared to the *S. aureus* TCH1516 reference. Since *S. aureus* TCH1516  
635 was the first genome to be annotated in the USA300 lineage, it was used as a reference  
636 genome for this study. (B) Dot plot of a nucleotide-based alignment of the genomes  
637 between *S. aureus* USA300 TCH1516 and LAC.

638

639

640 **Figure 2 | Comparison of CodY-binding sites between TCH1516 and LAC strains.**

641 (A) Direct comparison of CodY target genes between *S. aureus* substr. USA300  
642 TCH1516 and LAC at the genome. Upper panel: an overview of CodY-binding profiles  
643 across the *S. aureus* TCH1516 genome at mid-exponential growth phase in RPMI 1640  
644 + 10% LB medium. S/N denotes signal-to-noise ratio. (+) and (-) indicate forward and  
645 reverse reads, respectively. Bottom panel: an overview of CodY-binding profiles across  
646 the *S. aureus* LAC strain genome at mid-exponential growth phase under RPMI 1640 +  
647 10% LB medium. (B) Distribution of *in vivo* CodY genome-wide binding sites at the  
648 genome of the TCH1516 strain (upper panel). Comparison of CodY-binding sites obtained  
649 from this study (ChIP-exo) with CodY target genes from *S. aureus* USA200 UAMS-1 using  
650 IDAP-Seq (bottom panel). (C) The consensus DNA sequence for *S. aureus* TCH1516  
651 CodY binding motif. (D) The consensus DNA sequences for *S. aureus* LAC CodY binding  
652 motif.

653

654

655 **Figure 3 | Differential CodY binding peaks area plot for TCH1516 and LAC**  
656 **highlighting binding sites with identical binding motifs.**

657 (A) Binding peak areas of  $\log_2(\text{TCH1516\_binding\_intensity})$  (x-axis) and  
658  $\log_2(\text{Lac\_binding\_intensity})$  (y-axis) is shown. The diagonal line represents identical peak  
659 areas. The 45 binding sites with near zero sequence difference (Supplemental Figure 5)  
660 are shown with the solid dots, while those that are different are shown with open circles.  
661 (B) Case study I: the binding peak at the upstream of gene *yocS*, which has non-zero



662 motif score difference between TCH1516 and LAC. Annotations of color code nucleotides  
663 are shown in the legend. Nucleotides in red and green represent the CodY peak  
664 sequences in TCH1516 and LAC, respectively. Grey denotes the overlap between a pair  
665 of peak sequences. (C) Case study II: the binding peak at the gene  
666 USA300HOU\_RS01765, which has zero motif score difference between TCH1516 and  
667 LAC.

668  
669

670 **Figure 4 | Role of CodY in regulation of *S. aureus* USA300 LAC genes differentially**  
671 **expressed in the *codY* mutant.**

672 (A) The *S. aureus* USA300 LAC direct CodY regulon. LAC genes that had a CodY ChIP-  
673 exo binding and had at least 2-fold change ( $P < 0.05$ ) in RNA-seq expression between the  
674 *codY* mutant to the wild-type strain were assigned to the direct regulon. (B) Functional  
675 enrichment analysis by Clusters of Orthologous Groups (COG) classification of 809  
676 differentially expressed genes in *S. aureus* LAC *codY* mutant compared to wild type. The  
677 number of genes are based on the annotated genome. The top six enriched pathways  
678 were amino acid transport and metabolism, inorganic ion transport and metabolism,  
679 translation, ribosomal structure and biogenesis, transcription, carbohydrate transport and  
680 metabolism, and energy production and conversion. The functional enrichment was  
681 analyzed by performing the hypergeometric test. The asterisk indicates hypergeometric  
682 P-value  $< 0.05$ . (C) Reconstruction of 72 CodY regulon in *S. aureus* LAC strain.

683

684 **Figure 5 | Central metabolic flux rerouting to generate BCAA.**

685 (A) Optimal flux through CodY regulated biosynthetic enzymes, transporters and non-  
686 CodY regulated transporters in RPMI medium. When amino acids are present, *S. aureus*  
687 imports them via transporters (light blue and red bars). (B) pFBA solution of *S. aureus*  
688 grown in a chemically defined medium (CDMG) without BCAA predicts rerouting of  
689 several central carbon metabolic fluxes to generate BCAA precursors for BCAA. Red  
690 arrows represent reactions with increased flux during BCAA starvation and blue arrows  
691 represent those with decreased flux relative to starvation conditions. Malate  
692 dehydrogenase and aspartate synthase (blue arrows) lower flux when BCAA transporters  
693 were blocked. Note: Full ILV biosynthesis pathways are not shown. (C) Flux through  
694 pyruvate generating malate enzyme (ME2) and aspartate generating malate  
695 dehydrogenase (MDH3) and aspartate transaminase (ASPTA). The pathways in bold  
696 correspond to the biosynthesis pathways that contain CodY target genes.

697

698

699 **TABLE CAPTIONS**

700

701 **Table 1 Comparison of annotation features in *S. aureus* USA300 lineage**

702

703 **Table 2 The CodY target genes considered to be virulence factors in the TCH1516**  
704 **and LAC strains**

705

## 706 SUPPLEMENTARY MATERIALS

707

708 **Supplementary Figure 1 | Comparison of CodY sequences among *S. aureus***  
709 **USA300, *L. monocytogenes*, and *B. subtilis*.** Red rectangle denotes the CodY DNA-  
710 binding domain (Helix-Turn-Helix domain).

711

712 **Supplementary Figure 2 | Comparison of CodY sequences between *S. aureus***  
713 **USA300 TCH1516 and LAC strains.**

714

715 **Supplementary Figure 3 | The similarity between TCH1516 CodY binding motif and**  
716 **LAC CodY binding motif using TOMTOM. There are 18 bp nucleotides overlapping**  
717 **between them ( $p$ -value =  $9.35e-09$ ).**

718

719 **Supplementary Figure 4 | Comparison of CodY binding intensity between TCH1516**  
720 **and LAC strains.**

721

722 **Supplementary Figure 5 | Distribution of CodY peaks based on the range of motif**  
723 **score difference.** X-axis represents the range of motif score difference. Y-axis  
724 represents the number of peaks that fall into each range. Black-color bar showed 45  
725 peaks with the motif score difference at the range of (-1, 1).

726

727 **Supplementary Figure 6 | *S. aureus* USA300 CodY binding motif from a merged set**  
728 **of TCH1516 and LAC binding peaks.**

729

730 **Supplementary figure 7 | A heatmap for wild type and *codY* mutant samples for**  
731 **expression profiling data from *S. aureus* USA300 LAC.**

732

733 **Supplementary Figure 8 | Comparison of genes in the CodY regulon (red) and CodY**  
734 **iModulon (green). The number in the circle represents the amount of genes in the**  
735 **category.** CodY regulon is defined by a binding peak in the genes promoter region and  
736 detection of differential gene expression of the wild type and the *codY* mutant during  
737 growth in RPMI 1640 and 10% LB medium.

738

739 **Dataset S1 The strains used in this study**

740

741

**A.** GC Content  
 ■ GC Skew  
 ■ GC Skew(-)  
 ■ GC Skew(+)

|                          |                      |
|--------------------------|----------------------|
| <i>S. aureus</i> TCH1516 | <i>S. aureus</i> LAC |
| ■ 100% identity          | ■ 100% identity      |
| ■ 80% identity           | ■ 80% identity       |
| ■ 50% identity           | ■ 50% identity       |

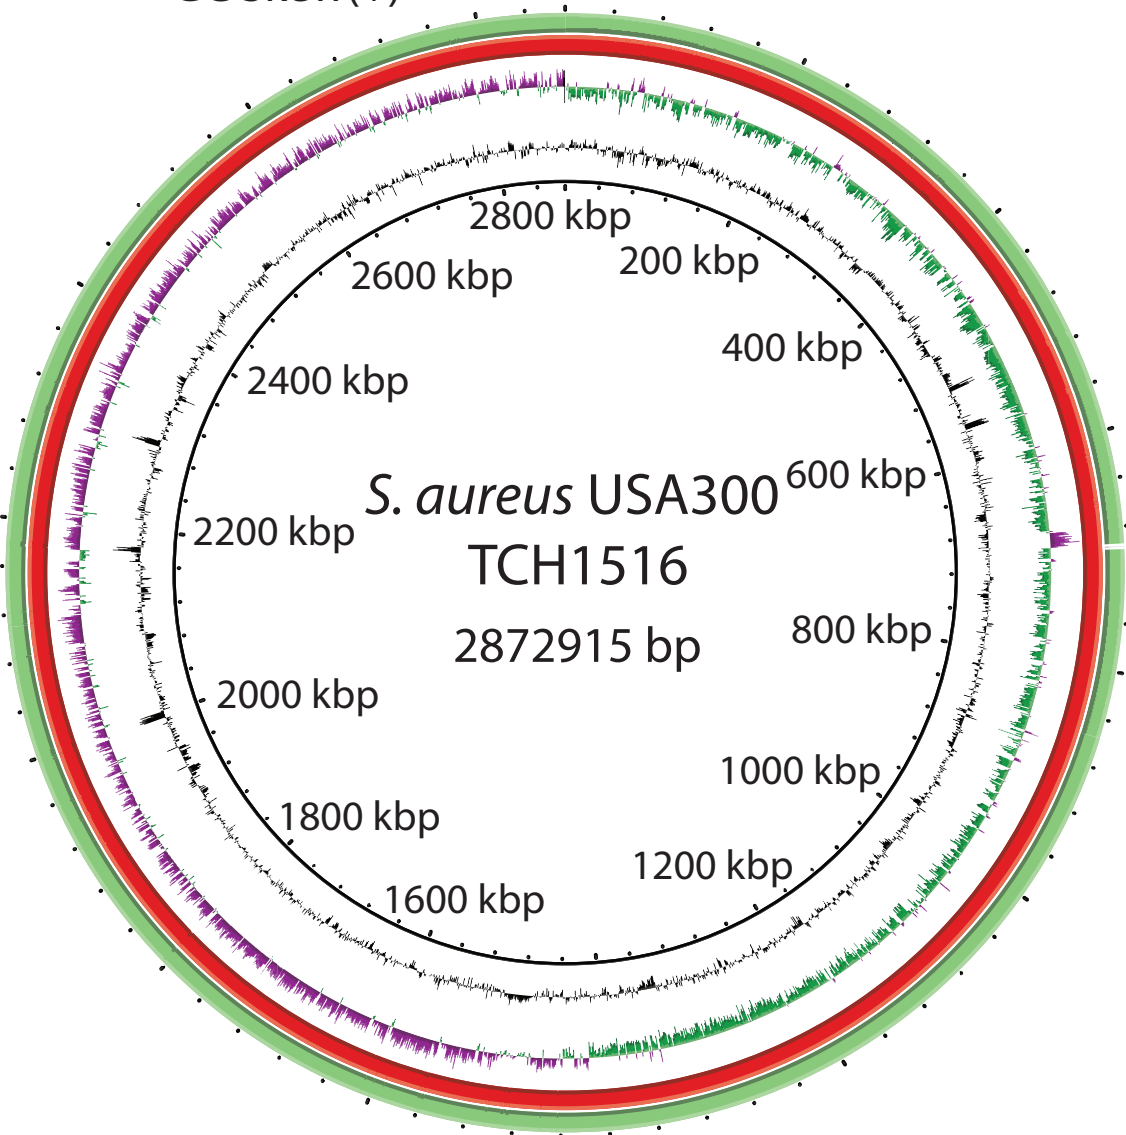

**B.**

The alignment between two genomes

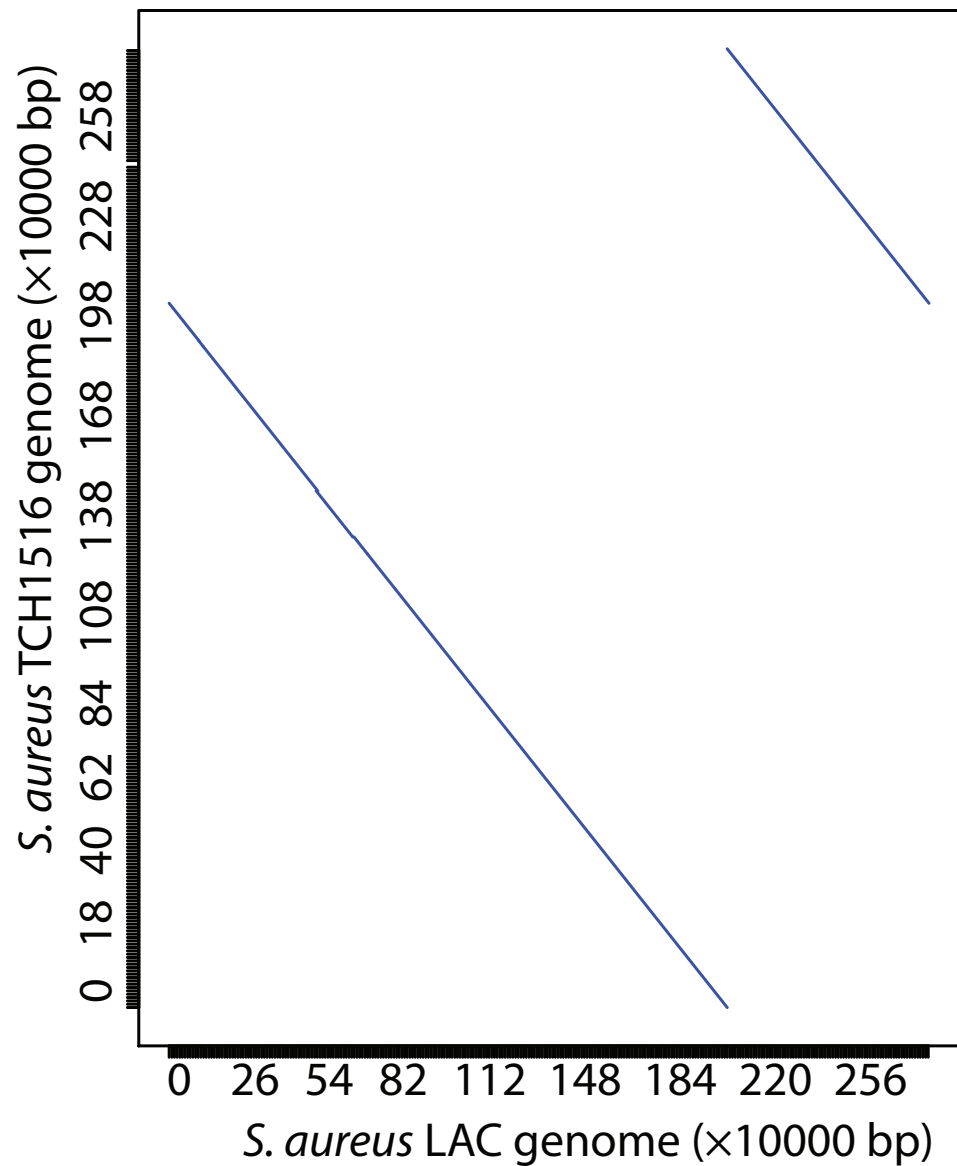

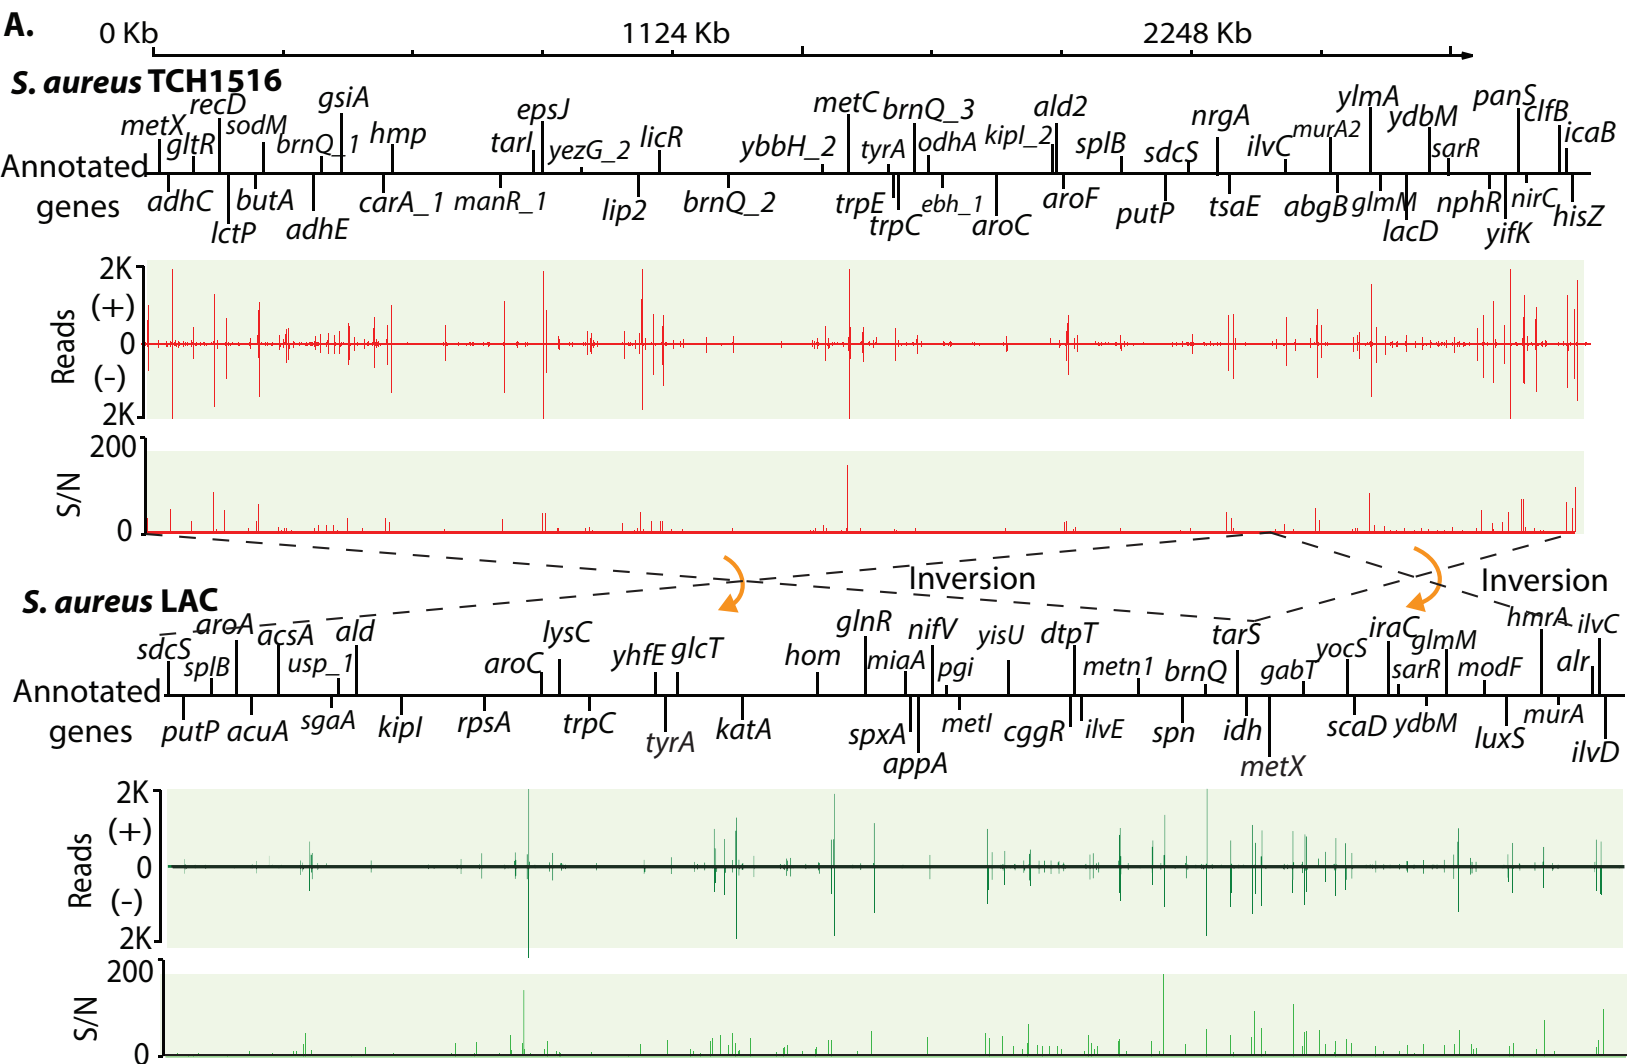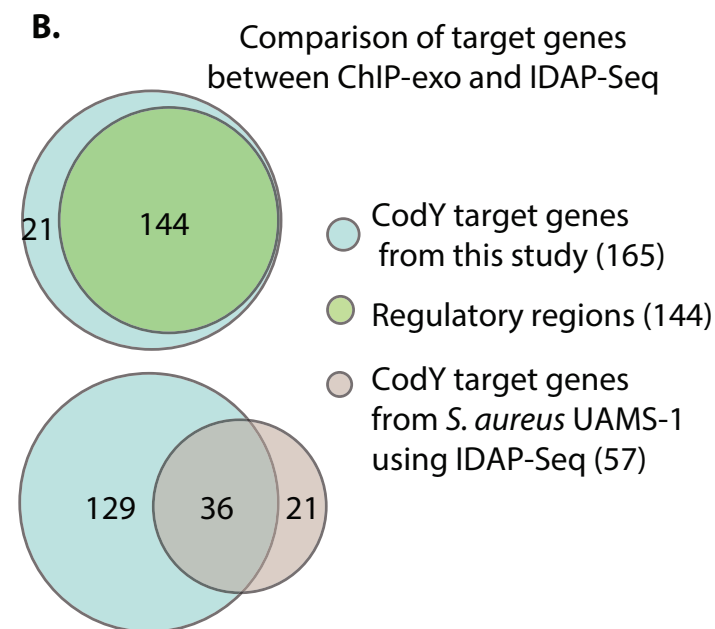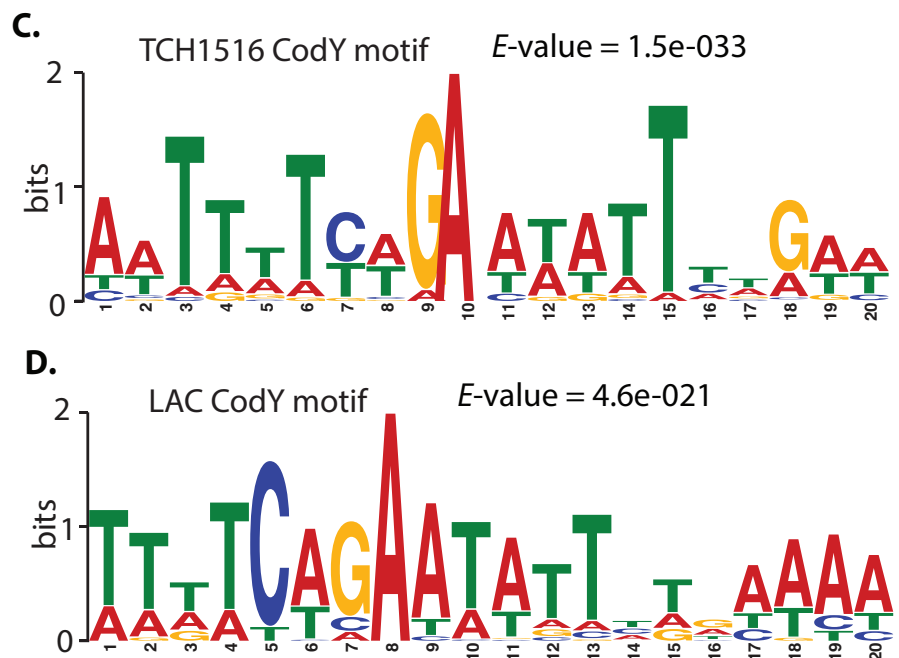

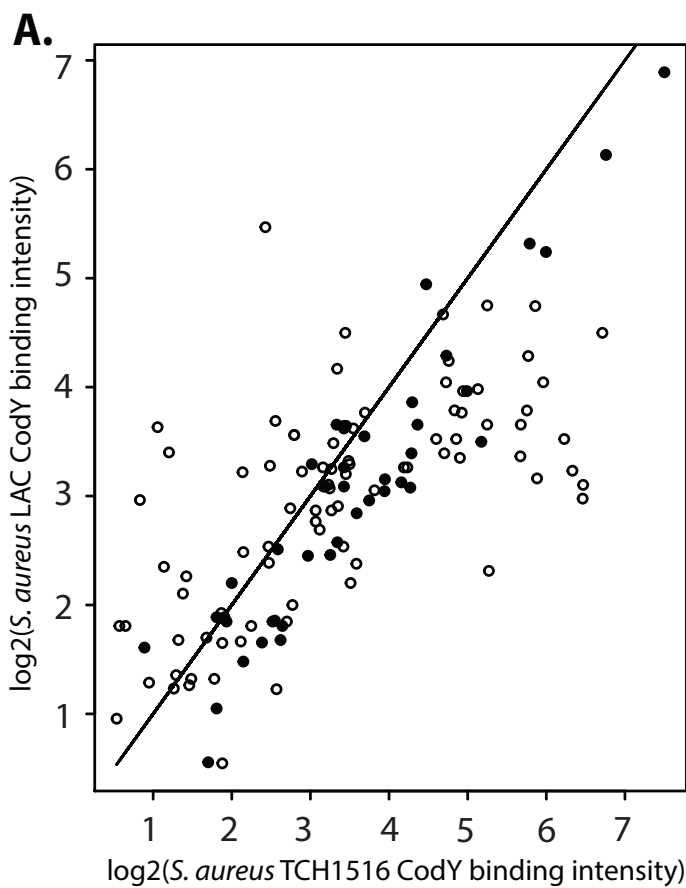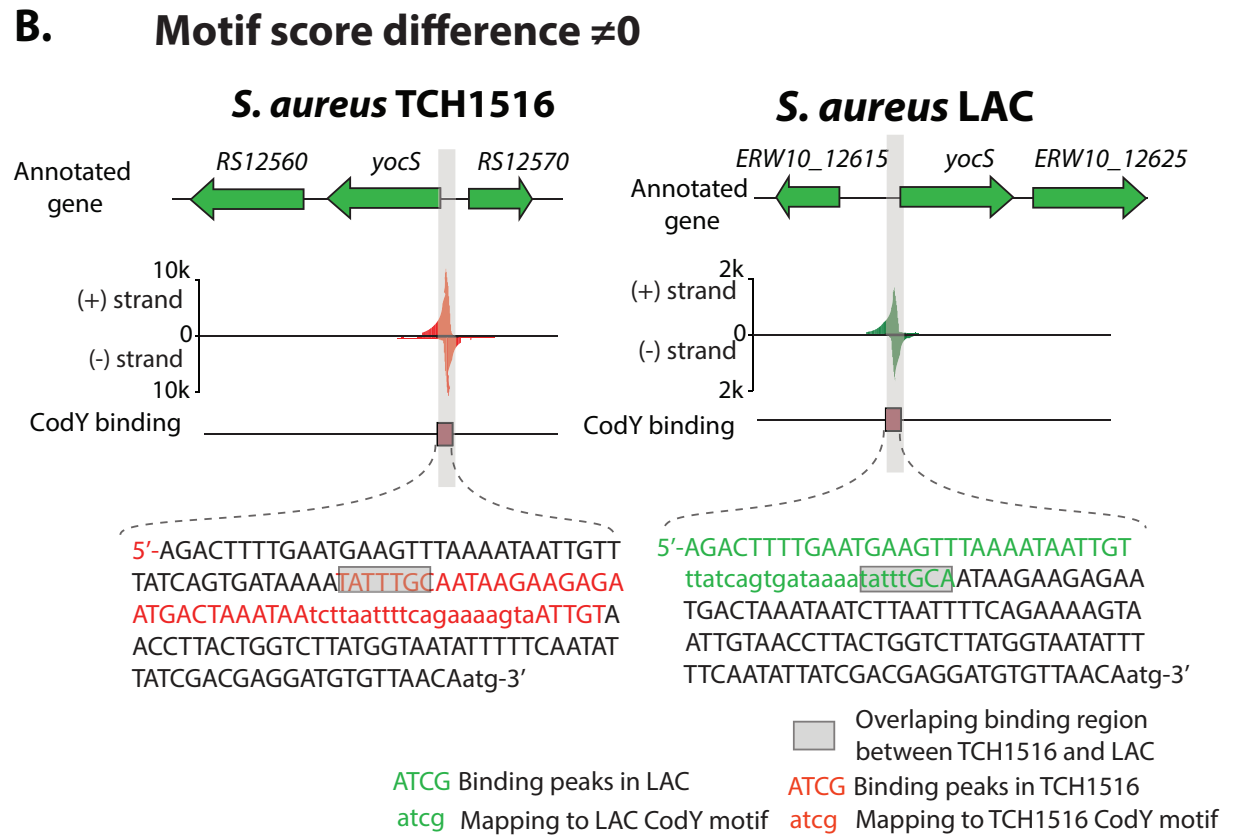

**C. Motif score difference = 0**

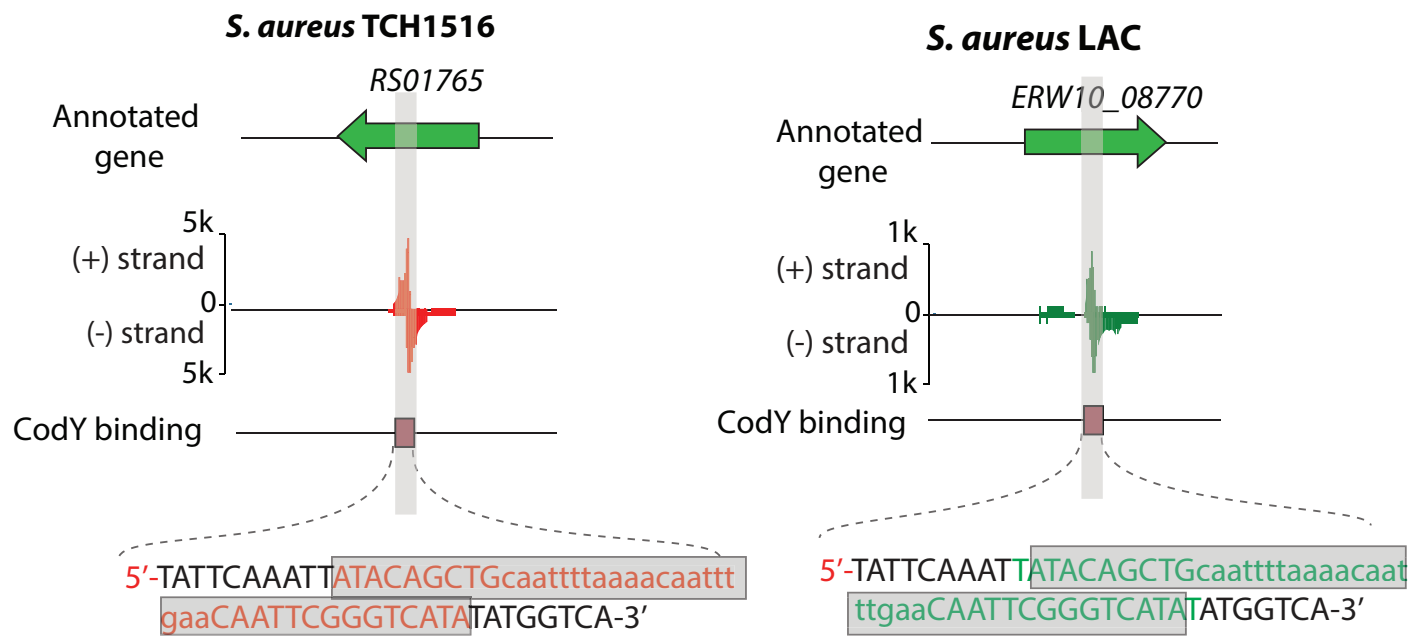

A.

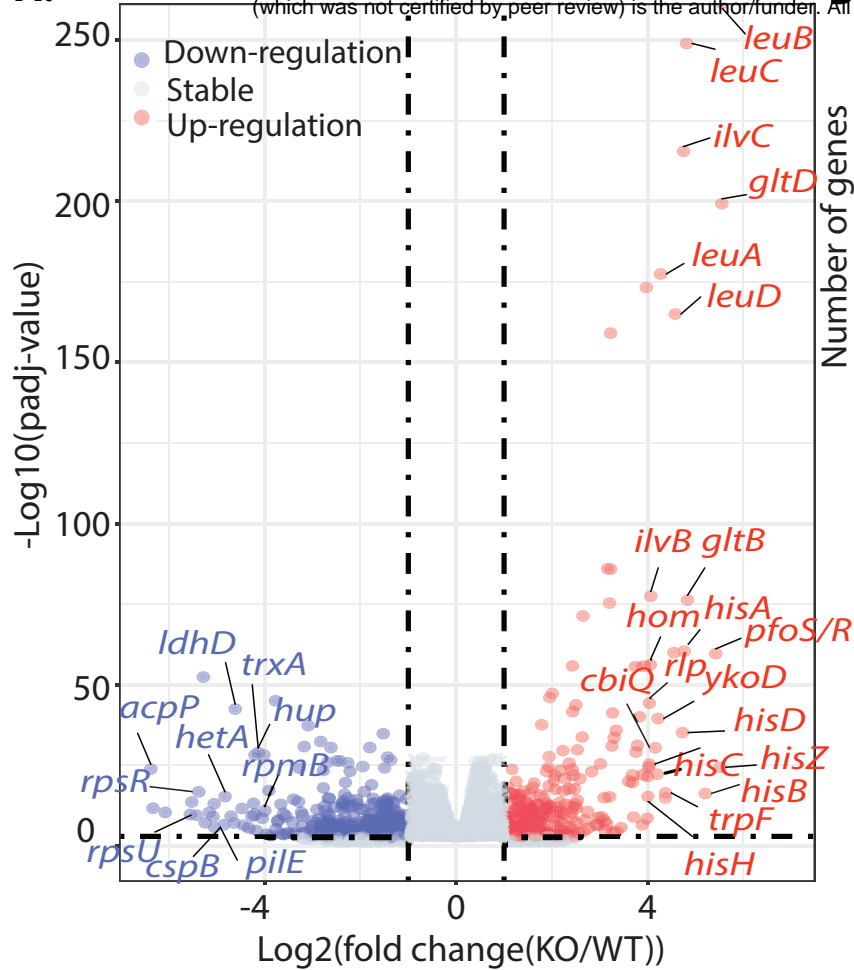

B.

Differential pathways in *S. aureus* LAC

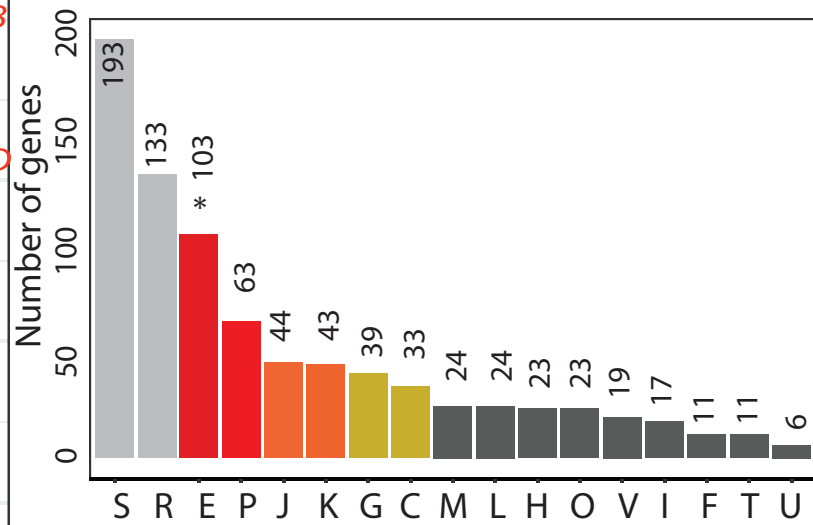

S = Function unknown  
 R = General function prediction only  
 E = Amino acid transport and metabolism  
 P = Inorganic ion transport and metabolism  
 J = Translation  
 K = Transcription  
 G = Carbohydrate transport and metabolism  
 C = Energy production and conversion

C.

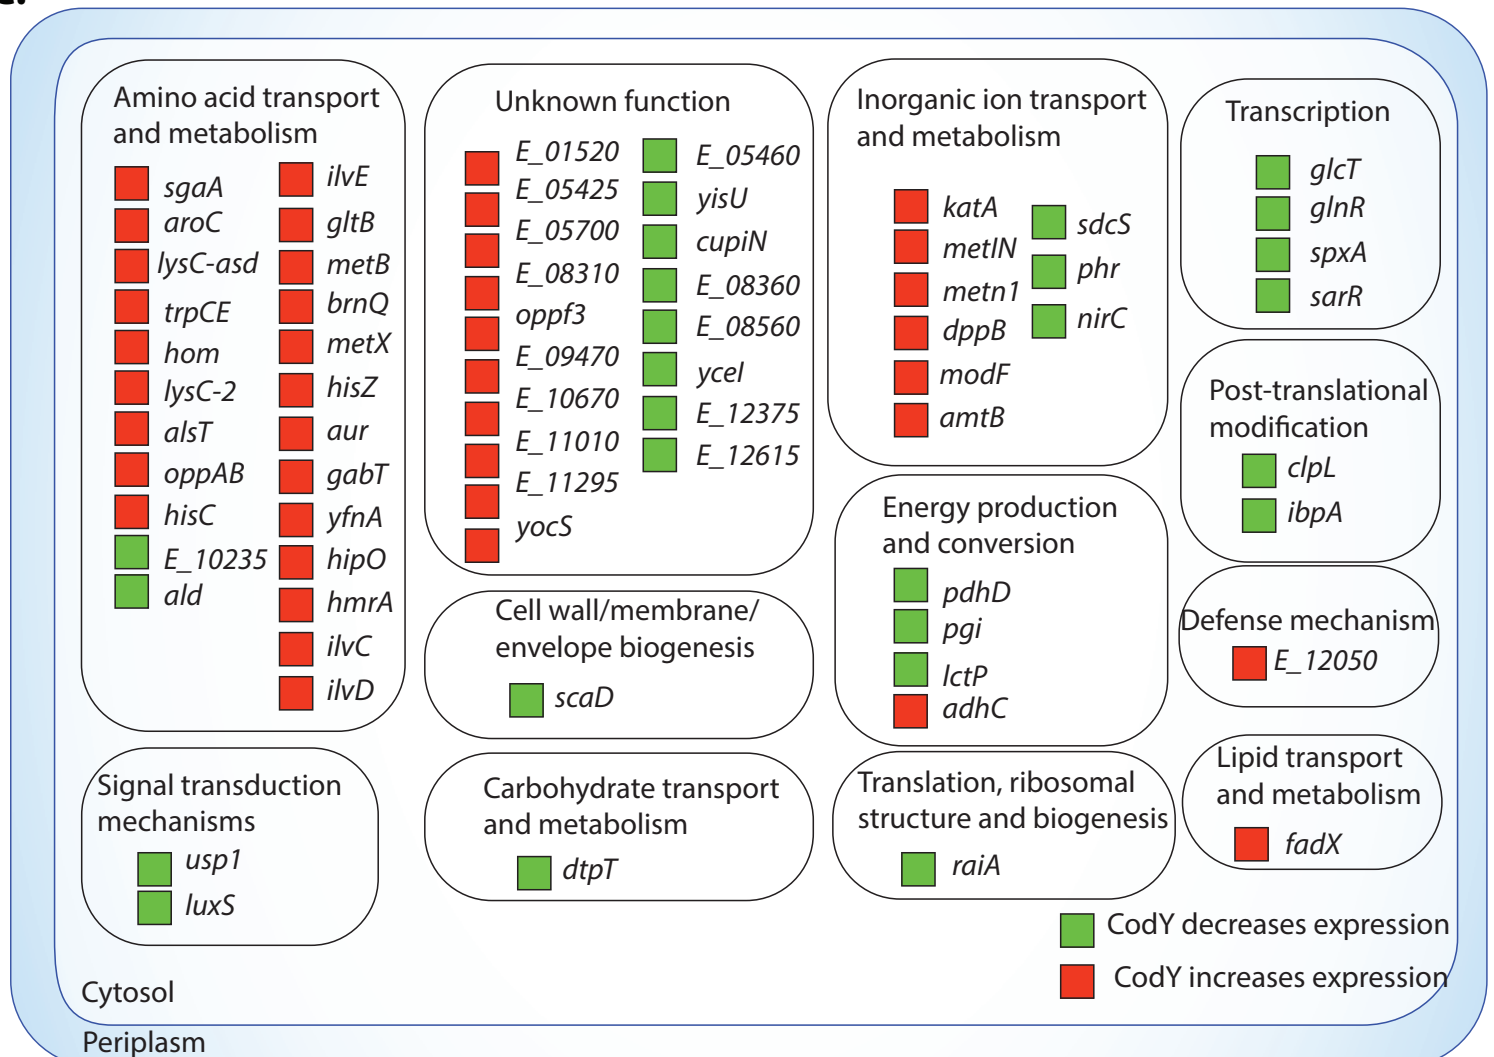

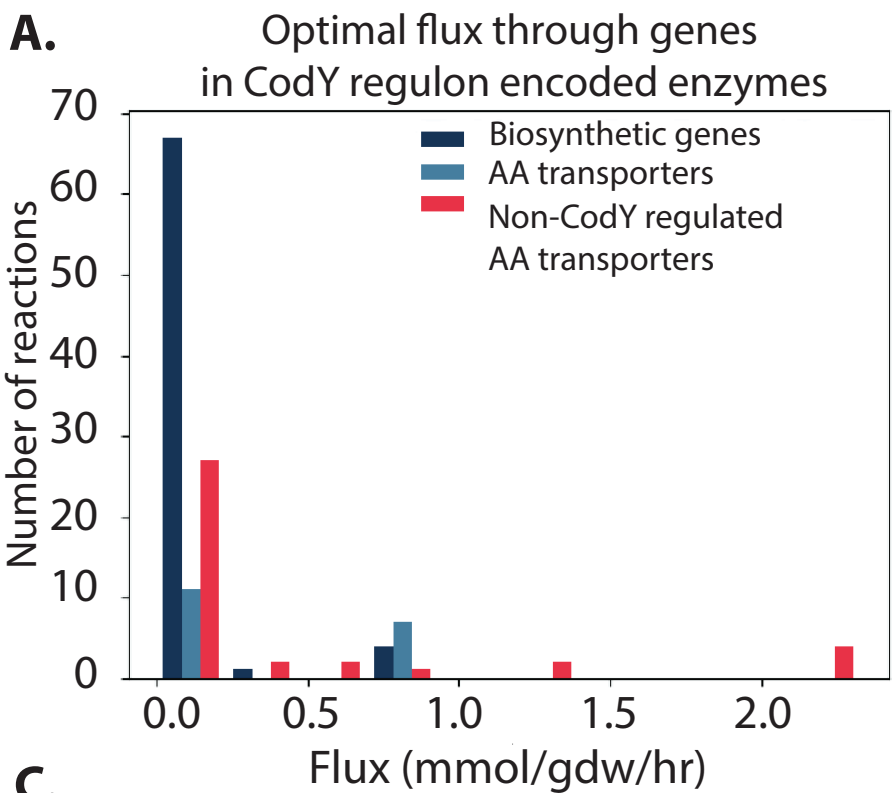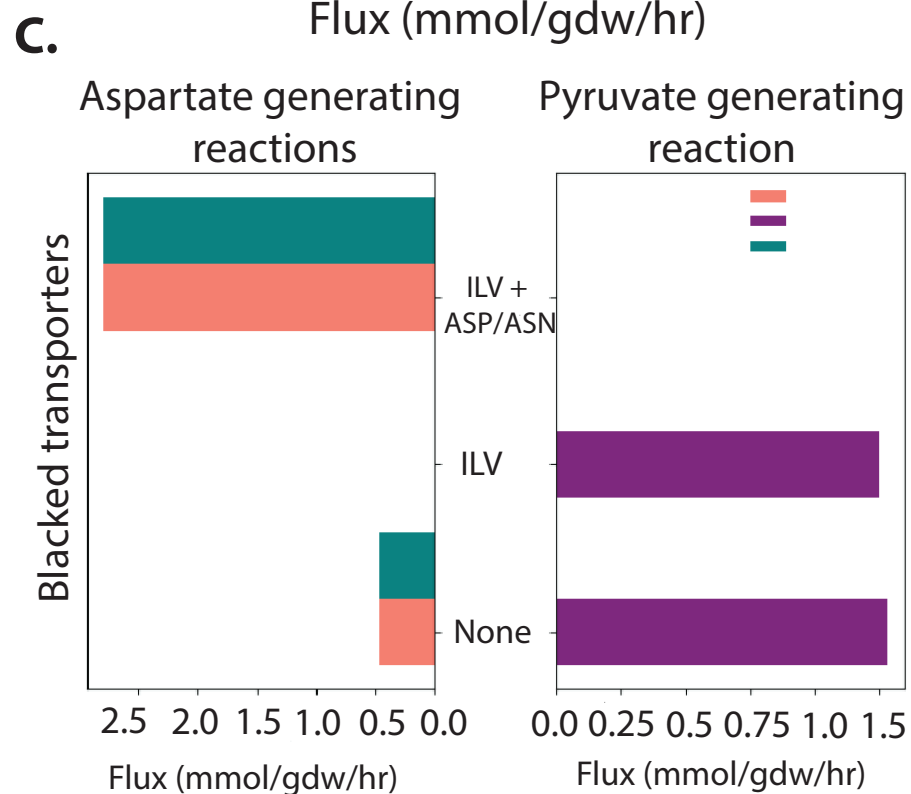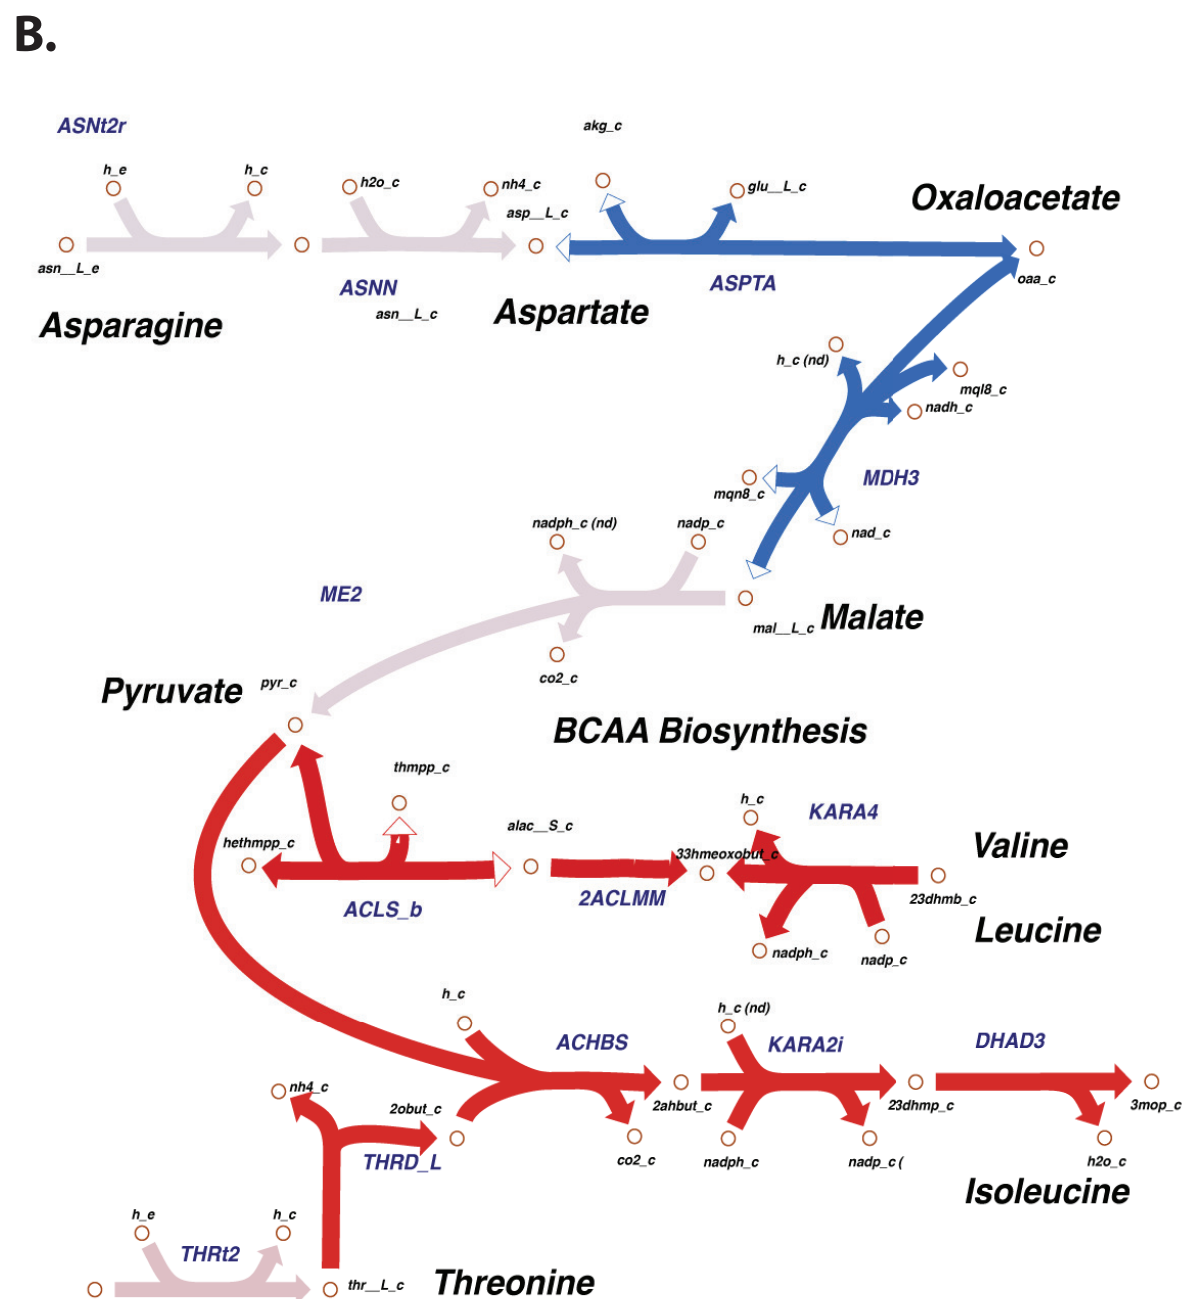



**Table 1 Comparison of annotation features in *S. aureus* USA300 lineage**

|                               | <i>S. aureus</i> TCH1516                                                             | <i>S. aureus</i> LAC                                  |
|-------------------------------|--------------------------------------------------------------------------------------|-------------------------------------------------------|
| Total sequence length (bp)    | 2,872,915                                                                            | 2,878,171                                             |
| Total chromosome and plasmids | 3,<br>NC_010079.1 (chromosome)<br>NC_012417.1 (plasmid 1)<br>NC_010063.1 (plasmid 2) | 2,<br>CP035369.1 (chromosome)<br>CP035370.1 (plasmid) |
| Gene (total)                  | 2920                                                                                 | 2892                                                  |
| CDS (total)                   | 2841                                                                                 | 2802                                                  |
| Genes/CDS (coding)            | 2763                                                                                 | 2733                                                  |
| RNA                           | 79                                                                                   | 90                                                    |
| rRNAs (5S, 16S, 23S)          | 6, 5, 5                                                                              | 7, 6, 6                                               |
| tRNAs                         | 59                                                                                   | 67                                                    |
| ncRNAs                        | 4                                                                                    | 4                                                     |
| Pseudo gene (total)           | 78                                                                                   | 69                                                    |

**Table 2 The CodY target genes considered to be virulence factors in the TCH1516 and LAC strains**

| <b>Virulence factors</b>                              | <b>Gene</b>    | <b><i>S. aureus</i> TCH1516</b> | <b><i>S. aureus</i> LAC</b> |
|-------------------------------------------------------|----------------|---------------------------------|-----------------------------|
| Cell wall associated fibronectin binding protein      | <i>ebh</i>     | Yes                             | Yes                         |
| Clumping factor B                                     | <i>clfB</i>    | Yes                             | Yes                         |
| Extracellular adherence protein/MHC analogous protein | <i>eap/map</i> | Yes                             | Yes                         |
| Intercellular adhesin                                 | <i>icaB</i>    | Yes                             | Yes                         |
| Hyaluronate lyase                                     | <i>hysA</i>    | Yes                             | Yes                         |
| Lipase                                                | <i>geh</i>     | Yes                             | Yes                         |
| Serine protease                                       | <i>splB</i>    | Yes                             | Yes                         |
| Sbi                                                   | <i>sbi</i>     | Yes                             | Yes                         |
| Type VII secretion system                             | <i>esaG</i>    | Yes                             | Yes                         |
| Enterotoxin-like K                                    | <i>selk</i>    | Yes                             | Yes                         |

N/A denotes the gene name unavailable in the reference genome.
